# Supplementary figures and images for: In vivo characterization of the Drosophila mRNA 3′ end processing core cleavage complex
Source: PubMed Central journal article supplement — RNA. 2015 Aug;21(8):1404–18. doi: 10.1261/rna.049551.115 (PMC4509931; doi:10.1261/rna.049551.115), 2015-08

# Michalski\_RNA049551\_Supplemental Figure 1

**A.**

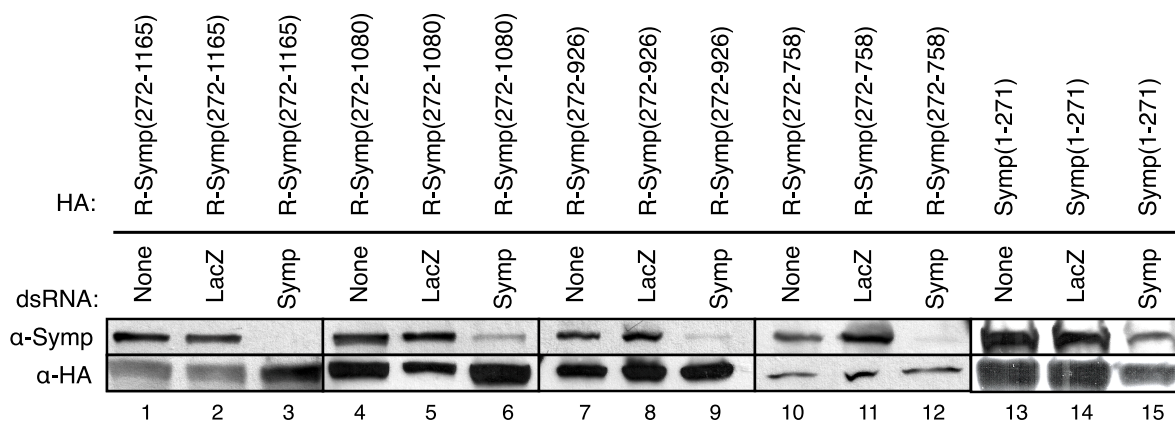

**B.**

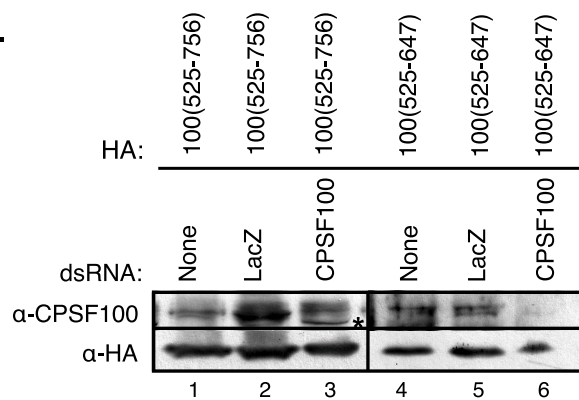

**C.**

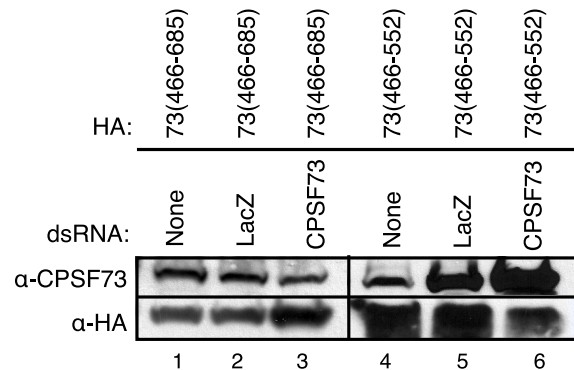

Supplement: supp_049551.115_SuppFig1.pdf [file supp_049551.115_SuppFig1.pdf]

# Michalski\_RNA049551\_Supplementary Figure 2

**A.**

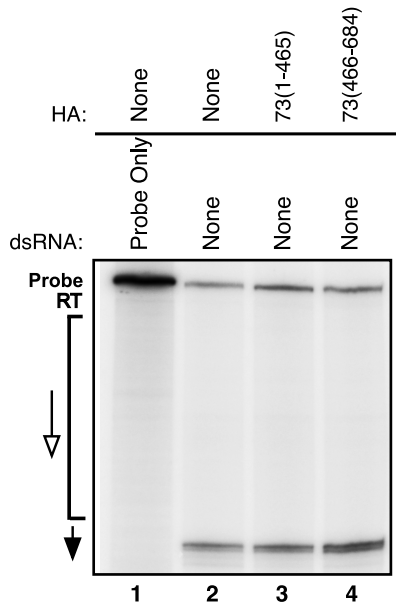

**B.**

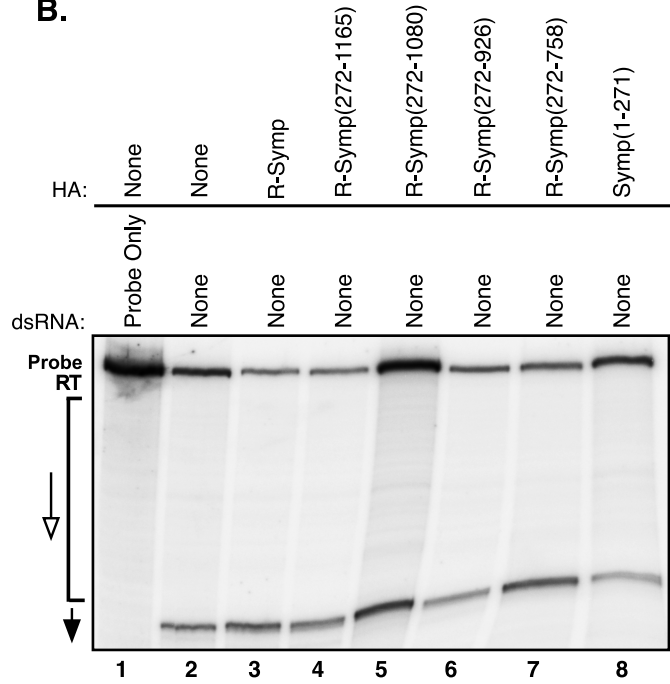

Supplement: supp_049551.115_SuppFig2.pdf [file supp_049551.115_SuppFig2.pdf]
